# Supplementary material
Source: Springer Nature journal article supplement (https://www.springermedizin.de/resource/supplementary/12913_2013_3505_MOESM3_ESM.pdf/9533028)
Supplement: MOESM3 [file 9533028]

## TABLES AND FIGURES

Table 1: Overview of relevant indicators and their availability.

|                          | <b>Total</b> | <b>Number and percentage of indicators relevant</b> | <b>Number and percentage of indicators not relevant</b> | <b>Number and percentage of relevant indicators available</b> |
|--------------------------|--------------|-----------------------------------------------------|---------------------------------------------------------|---------------------------------------------------------------|
| <b>External Services</b> | 187          | 132 (71%)                                           | 55 (29%)                                                | 100 (76%)                                                     |
| <b>Epidemiologic</b>     | 109          | 68 (62%)                                            | 41 (38%)                                                | 36 (53%)                                                      |
| <b>Performance</b>       | 78           | 64 (82%)                                            | 14 (18%)                                                | 64 (100%)                                                     |
| <b>Internal Services</b> | 192          | 53 (28%)                                            | 139 (72%)                                               | 46 (87%)                                                      |
| <b>Epidemiologic</b>     | 108          | 29 (27%)                                            | 79 (73%)                                                | 26 (90%)                                                      |
| <b>Performance</b>       | 84           | 24 (29%)                                            | 60 (71%)                                                | 20 (83%)                                                      |
| <b>Mixed Services</b>    | 99           | 19 (19%)                                            | 80 (81%)                                                | 13 (68%)                                                      |
